---

## Correction

*Vacuole–mitochondrial cross-talk during apoptosis in yeast: a model for understanding lysosome–mitochondria-mediated apoptosis in mammals*

Maria João Sousa, Flávio Azevedo, Andreia Pedras, Carolina Marques, Olga P. Coutinho, Ana Preto, Hernâni Gerós, Susana R. Chaves and Manuela Côrte-Real

Volume 39 Part 5 (2011) 1533–1537

The forenames of the second and third authors were incorrect in this article. They appear correctly here.
